# Supplementary material for: Dry Period Heat Stress Impacts Mammary Protein Metabolism in the Subsequent Lactation
Source: MDPI journal article supplement (doi:10.3390/ani11092676), 2021-09-13
Supplement: s1 [file s1]

## Dry period heat stress impacts mammary protein metabolism in the subsequent lactation

Bethany Dado-Senn<sup>1</sup>, Amy L. Skibielski<sup>2</sup>, Geoffrey E. Dahl<sup>2</sup>, Sebastian I. Arriola Apelo<sup>1</sup>, and Jimena Laporta<sup>1,\*</sup>

**Table S1.** Primer sequences for validated and housekeeping genes.

| Gene Symbol     | Accession Number | 5' ->3' | Primer Sequence                | Source  |
|-----------------|------------------|---------|--------------------------------|---------|
| <i>SLC1A1</i>   | U72534           | F. 880  | <u>GG</u> CTTGCAATCCACTCCATT   | [31]    |
|                 |                  | R. 980  | CAGAAGAGCCTGGGCCATT            |         |
| <i>SLC1A5</i>   | BC123803         | F. 850  | CTGGTGAAGGTGCCCACTG            | [31]    |
|                 |                  | R. 978  | GAAGAAGCGAATGAGCAGCTC          |         |
| <i>SLC3A2</i>   | BC102420         | F. 861  | GTGTGGACGGGTTTCAGGTC           | [31]    |
|                 |                  | R. 961  | <u>CC</u> GATCCTCACTGACGCTCT   |         |
| <i>SLC7A1</i>   | DQ399522         | F. 418  | CTTCGACCTGAAGGACCTGG           | [31]    |
|                 |                  | R. 518  | GCTCGGGCTGGTAT <u>TC</u> GTAAG |         |
| <i>SLC7A5</i>   | BC126651         | F. 753  | <u>GGG</u> TGACGTAGCCAATCTGG   | [31]    |
|                 |                  | R. 859  | ATCCCCCATAGGCAAAGAGG           |         |
| <i>SLC36A1</i>  | CB438466         | F. 39   | ACCTGCCCAACTGTT <u>GG</u> CT   | [31]    |
|                 |                  | R. 140  | TGATGATCTCGGCAGGGAC            |         |
| <i>4E-BP1</i>   | BC120290         | F. 357  | TTTGAGATGGACATTTAAAGGGC        | [31]    |
|                 |                  | R. 457  | CTTGCATAAGGCCTGGCTG            |         |
| <i>rpS6</i>     | NM_001015548     | F. 150  | CTGGGTGAAGAATGGAAG <u>GG</u>   | [31]    |
|                 |                  | R. 250  | CGAACTCTGCCATGGGTCA            |         |
| <i>p70 S6K1</i> | DN544771         | F. 250  | CAAGCTTGCAATGCTAATTTGTCC       | [31]    |
|                 |                  | R. 350  | TTGAGTCCTGATCATGTCGAAGA        |         |
| <i>Akt</i>      | NM_173986        | F. 1565 | CACGTGCTCTGGACGCTTC            | [31]    |
|                 |                  | R. 1666 | ATGGCGAGGTTCCACTCAAAC          |         |
| <i>ULK1</i>     | NC_037344.1      | F. 68   | CAGAACTACCAGCGCATTTGA          | [58]    |
|                 |                  | R. 176  | GTGCAAAGCCCCAAAGGACT           |         |
| <i>RPS9</i>     | NM_001101152     | F. 192  | GGAGACCCTTCGAGAAGTCC           | [30,32] |
|                 |                  | R. 254  | CTTCTCATCCAGCGTCAGC            |         |
| <i>UXT</i>      | XM_004022128.3   | F. 323  | TGTGGCCCTTGGATATGGTT           | [32]    |
|                 |                  | R. 423  | GGTTGTCGCTGAGCTCTGTG           |         |

<sup>58</sup> Untergasser, A.; Cutcutache, I.; Koressaar, T.; Ye, J.; Faircloth, B.C.; Remm, M.; et al. Primer3-new capabilities and interfaces. *Nucleic Acids Res.* **2012**, *40*, 1–12. doi:10.1093/nar/gks596

Figure S1. qRT-PCR melting peaks of amino acid (AA) and mTOR pathway genes assessed.

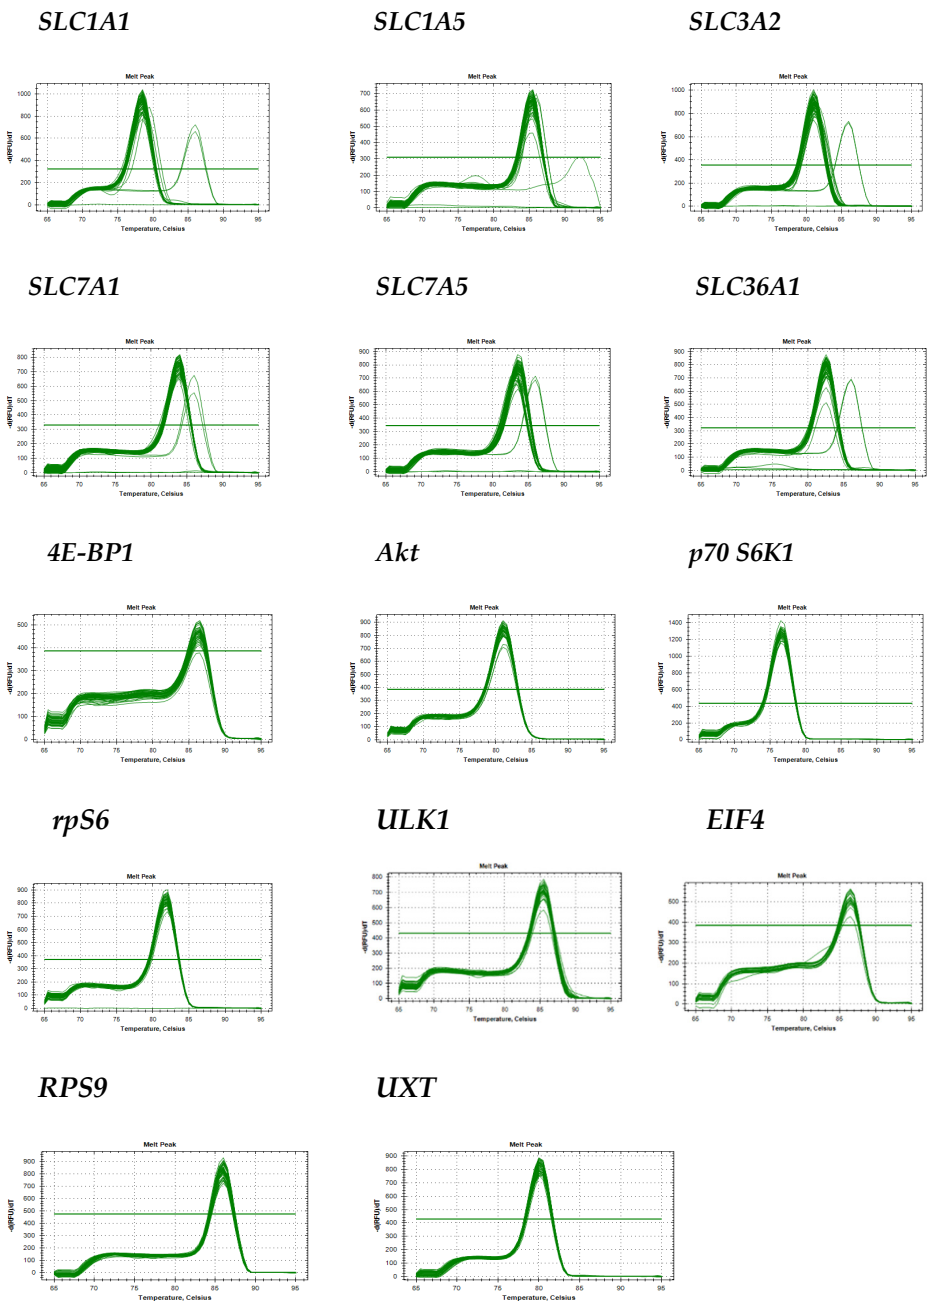

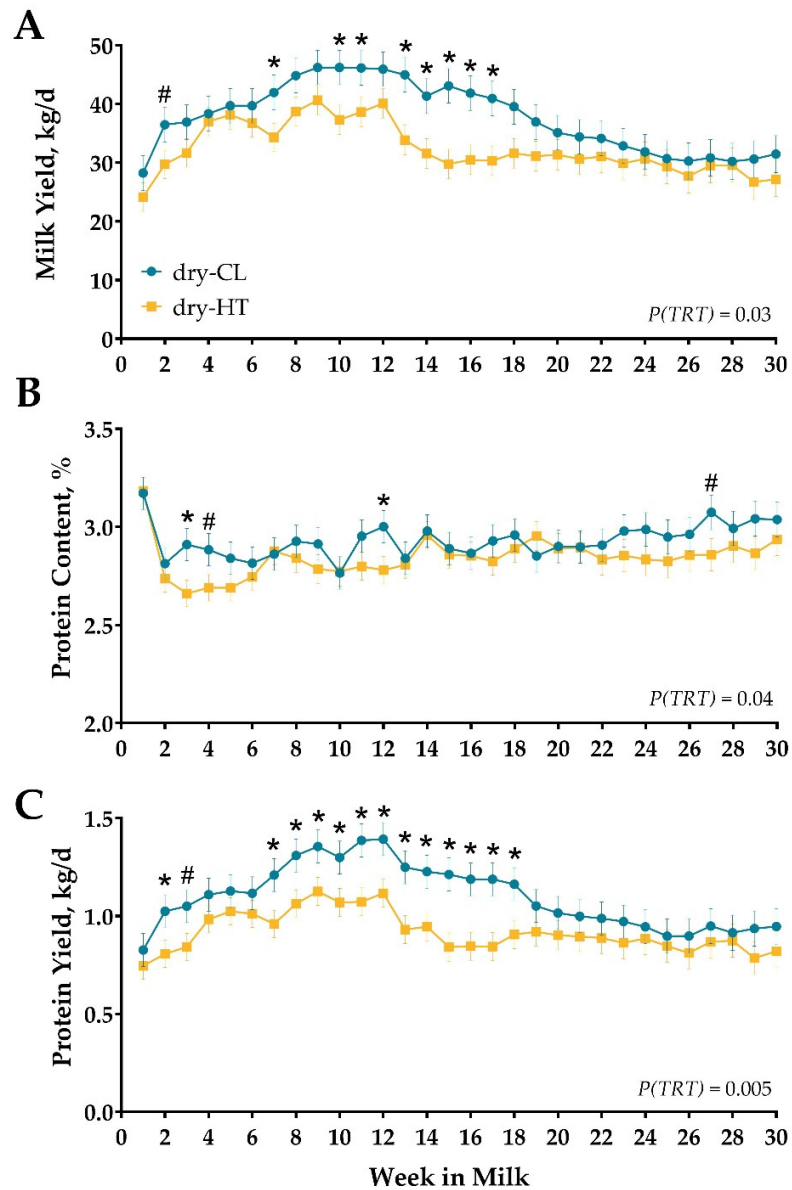

**Figure S2.** Effect of dry period heat stress on milk yield and composition over time. Multiparous Holstein cows were exposed to dry period heat stress (dry-HT, shade only,  $n = 12$ ) or cooling (dry-CL, shade, fans, and water soakers,  $n = 12$ ) for 46 d before calving. After calving, all cows were actively cooled and colostrum and milk yield and protein were measured daily and averaged weekly in AfiFarm up to 210 DIM. Milk protein is reported as content (%) and yield (kg/d; calculated from milk yield). All data are presented as  $LSM \pm SE$  of the treatment  $\times$  week in milk interaction. \* indicates  $P \leq 0.05$ ; # indicates  $0.05 < P \leq 0.10$ .

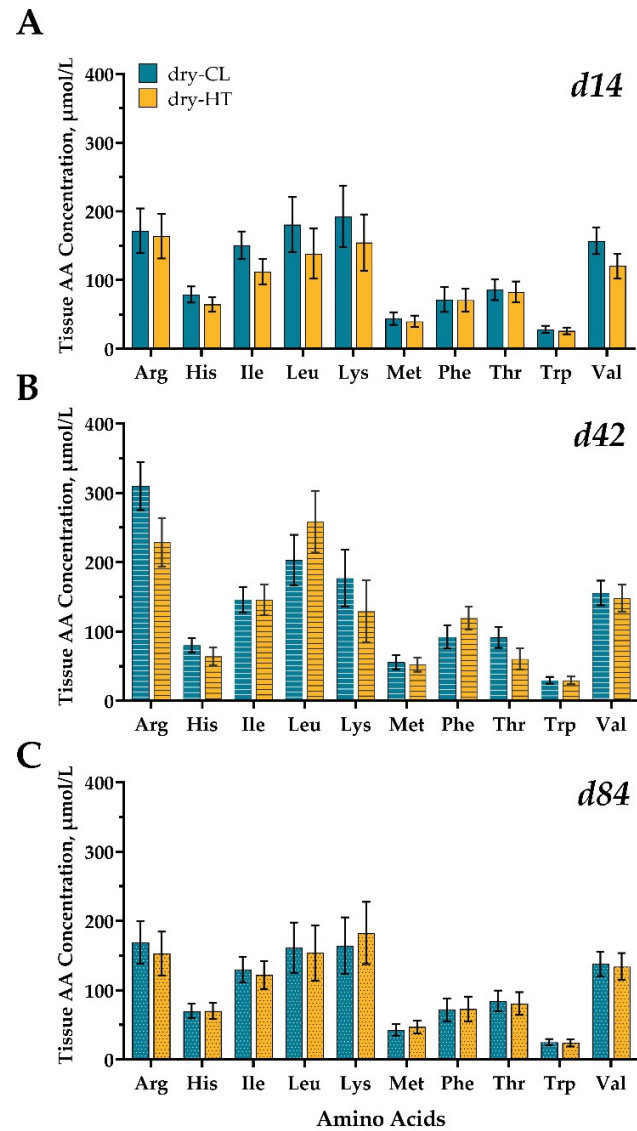

**Figure S3.** Mammary tissue amino acid (AA) concentrations. Multiparous Holstein cows were exposed to dry period heat stress (dry-HT, shade only,  $n = 12$ ) or cooling (dry-CL, shade, fans, and water soakers,  $n = 12$ ) for 46 d before calving. After calving, both groups had access to shade, fans, and water soakers. Mammary biopsies collected at 14, 42, and 84 DIM were used to analyze AA concentration via LCMS. All data are presented as LSM  $\pm$  SE of the treatment at each time point.

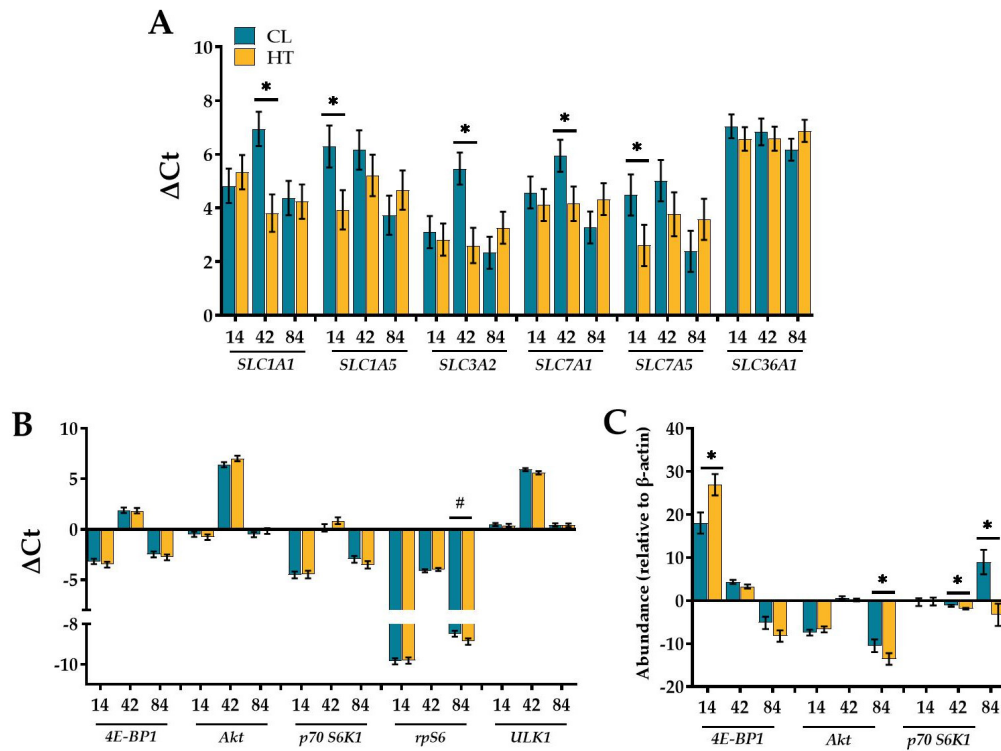

**Figure S4.** Effect of dry period heat stress on relative expression of (A) mammary AA transporter genes, (B) mTOR pathway genes, and (C) mTOR pathway proteins during lactation. Cows were exposed to dry period heat stress (dry-HT, n = 6) or cooling (dry-CL, n = 6) for ~46 d pre-calving. Mammary biopsies were collected at 14, 42, and 84 DIM (after treatment exposure), and RNA and protein were extracted from mammary tissue for analysis. Gene expression (A,B) is reported as the  $\Delta C_t$ , the relative expression compared to housekeeping genes. A higher  $\Delta C_t$  indicates a lower expression relative to the housekeeping genes. Protein abundance (C) is relative to the protein  $\beta$ -actin. Data are presented as LSM  $\pm$  SE.

**Table S2.** Effect of dry period heat stress on plasma free amino acid (AA) concentration during lactation. Cows were exposed to dry period heat stress (dry-HT,  $n = 5$ ) or cooling (dry-CL,  $n = 5$ ) for 46 d pre-calving. Blood was collected at 14, 42, and 84 DIM and plasma was analyzed for free AA concentration. Data are presented as LSM  $\pm$  SE of the treatment.

| Amino acid ( $\mu\text{g/mL}$ ) | TRT    |        | SEM   | <i>p</i> -value |       |                  |
|---------------------------------|--------|--------|-------|-----------------|-------|------------------|
|                                 | dry-CL | dry-HT |       | TRT             | DIM   | TRT $\times$ DIM |
| $\alpha$ -amino adipic acid     | 1.64   | 1.50   | 0.26  | 0.70            | 0.29  | 0.71             |
| $\alpha$ -amino n-butyric acid  | 1.56   | 1.59   | 0.08  | 0.79            | 0.08  | 0.23             |
| Alanine                         | 20.60  | 19.53  | 1.64  | 0.66            | 0.72  | 0.40             |
| Arginine                        | 12.00  | 12.26  | 0.80  | 0.82            | 0.01  | 0.51             |
| Asparagine                      | 4.11   | 4.04   | 0.31  | 0.88            | 0.09  | 0.29             |
| Aspartic Acid                   | 1.54   | 1.40   | 0.16  | 0.53            | <0.01 | 0.08             |
| Carnosine                       | 6.07   | 6.67   | 0.40  | 0.32            | <0.01 | 0.45             |
| Citrulline                      | 14.59  | 14.60  | 1.04  | 0.99            | 0.03  | 0.17             |
| Cystathionine                   | 0.41   | 0.40   | 0.03  | 0.94            | 0.32  | 0.83             |
| Ethanolamine                    | 0.22   | 0.19   | 0.02  | 0.43            | 0.02  | 0.97             |
| Glutamic acid                   | 9.02   | 10.17  | 0.34  | 0.04            | 0.76  | 0.48             |
| Glutamine                       | 29.55  | 26.33  | 2.03  | 0.30            | 0.34  | 0.45             |
| Glycine                         | 23.28  | 24.81  | 2.40  | 0.67            | <0.01 | 0.54             |
| Histidine                       | 7.07   | 6.78   | 0.48  | 0.69            | 0.98  | 0.84             |
| Homocystine                     | 0.55   | 0.67   | 0.10  | 0.41            | 0.34  | 0.21             |
| Hydroxylysine                   | 0.06   | 0.05   | 0.02  | 0.70            | 0.58  | 0.92             |
| Hydroxyproline                  | 1.77   | 1.96   | 0.16  | 0.43            | 0.17  | 0.79             |
| I methyl histidine              | 2.62   | 2.67   | 0.20  | 0.88            | 0.02  | 0.37             |
| III methyl histidine            | 0.65   | 0.61   | 0.07  | 0.72            | <0.01 | 0.83             |
| Isoleucine                      | 13.36  | 13.35  | 0.63  | 0.99            | 0.58  | 0.88             |
| Leucine                         | 19.68  | 18.86  | 1.21  | 0.65            | 0.66  | 0.82             |
| Lysine                          | 11.02  | 11.22  | 0.65  | 0.83            | 0.56  | 0.03             |
| Methionine                      | 3.10   | 3.14   | 0.16  | 0.89            | 0.02  | 0.78             |
| Ornithine                       | 5.61   | 5.78   | 0.37  | 0.75            | 0.06  | 0.98             |
| Phenylalanine                   | 7.13   | 8.01   | 0.21  | 0.02            | 0.36  | 0.89             |
| Phosphoserine                   | 1.19   | 1.09   | 0.06  | 0.22            | 0.06  | 0.15             |
| Proline                         | 10.84  | 11.75  | 0.75  | 0.42            | 0.89  | 0.55             |
| Sarcosine                       | 1.23   | 1.18   | 0.10  | 0.75            | 0.47  | 0.37             |
| Serine                          | 10.09  | 10.07  | 0.41  | 0.97            | 0.01  | 0.68             |
| Taurine                         | 5.70   | 6.44   | 0.24  | 0.06            | 0.01  | 0.14             |
| Threonine                       | 10.22  | 10.33  | 0.60  | 0.90            | 0.77  | 0.19             |
| Tryptophan                      | 24.29  | 24.99  | 0.52  | 0.38            | 0.19  | 0.10             |
| Tyrosine                        | 7.04   | 7.94   | 0.39  | 0.14            | 0.05  | 0.23             |
| Urea                            | 232.89 | 221.79 | 14.33 | 0.60            | 0.05  | 0.56             |
| Valine                          | 27.79  | 26.67  | 1.76  | 0.66            | 0.23  | 0.85             |
| $\lambda$ -amino butyric acid   | 0.09   | 0.08   | 0.04  | 0.85            | 0.65  | 0.22             |

**Table S3.** Effect of dry period heat stress on relative expression of mammary AA transporter genes during lactation. Cows were exposed to dry period heat stress (dry-HT,  $n = 6$ ) or cooling (dry-CL,  $n = 6$ ) for ~46 d pre-calving. Mammary biopsies were collected at 14, 42, and 84 DIM (after treatment exposure), and RNA was extracted from mammary tissue to analyze amino acid transporter gene expression. Gene expression is reported as the  $\Delta C_t$ , the relative expression compared to housekeeping genes. Data are presented as  $LSM \pm SE$ .

| Gene of Interest<br>(relative expression) | TRT    |        | SEM  | P-value |      |         |
|-------------------------------------------|--------|--------|------|---------|------|---------|
|                                           | dry-CL | dry-HT |      | TRT     | DIM  | TRT*DIM |
| <i>SLC1A1</i>                             | 5.38   | 4.46   | 0.41 | 0.14    | 0.23 | 0.02    |
| <i>SLC1A5</i>                             | 5.39   | 4.60   | 0.57 | 0.35    | 0.04 | 0.06    |
| <i>SLC3A2</i>                             | 3.63   | 2.90   | 0.38 | 0.20    | 0.08 | 0.01    |
| <i>SLC7A1</i>                             | 4.60   | 4.20   | 0.43 | 0.53    | 0.05 | 0.03    |
| <i>SLC7A5</i>                             | 3.96   | 3.32   | 0.57 | 0.44    | 0.08 | 0.08    |
| <i>SLC36A1</i>                            | 6.68   | 6.66   | 0.23 | 0.96    | 0.78 | 0.34    |
